# Supplementary material
Source: publisher figshare collection journal article supplement (https://gsajournals.figshare.com/ndownloader/files/15635732)
Supplement: Supplementary file 1 [file 15635732]

stock,rescues,start,end,type
29759,n,8192725,9030055,dash
30522,n,8714331,9686653,dash
29782,y,9355691,10744934,dash
29783,n,10085520,10744934,dash
29784,n,10331363,10744934,dash
29786,n,10460679,10744934,dash
29788,n,10601454,10744934,dash
30333,y,9677341,9784700,solid
30334,n,9762229,9807047,solid
